1 **Status, determinants and risk factors of all-cause dementia in South Asia: Findings from**  
2 **a preliminary analysis of global health data**

3

4 Dushani L. Palliyaguru<sup>1\*</sup>, Nipuni Palliyaguru<sup>1</sup>, Camila Vieira Ligo Teixeira<sup>2</sup>, Nicole M.  
5 Armstrong<sup>3</sup>, Sanka Liyanage<sup>4</sup>, Upul Senarath<sup>5</sup>, Carukshi Arambepola<sup>5</sup>, Saroj Jayasinghe<sup>6</sup>,  
6 Chamila Dalpatadu<sup>7</sup>

7

8 <sup>1</sup>HealthSurveil, Lubbock, TX, US

9 <sup>2</sup>Blanchette Rockefeller Neurosciences Center, West Virginia University, Morgantown, WV, US

10 <sup>3</sup>Department of Psychiatry and Human Behavior, Warren Alpert Medical School of Brown  
11 University, Providence, RI, US

12 <sup>4</sup>Group NIRE, Lubbock, TX, US

13 <sup>5</sup>Department of Community Medicine, University of Colombo Faculty of Medicine, Colombo, Sri  
14 Lanka

15 <sup>6</sup>Department of Clinical Medicine, University of Colombo Faculty of Medicine, Colombo, Sri  
16 Lanka

17 <sup>7</sup>Department of Physiology, University of Colombo Faculty of Medicine, Colombo, Sri Lanka

18 \*Corresponding and senior author

19

20

21

22

23

24

25

26

27 **ABSTRACT**

28 South Asia is one of the most populous regions of the world. At present, South Asians make up  
29 more than 25% of the world's population but little effort has been dedicated to studying trends  
30 and etiological factors driving aging and aging-related conditions in this part of the world. Even  
31 less characterization has been done on brain-related conditions, particularly all-cause dementia  
32 in South Asia. To address this, we examined data from the US Census Bureau, World Health  
33 Organization Global Dementia Observatory and the Global Burden of Disease (GBD) 2019  
34 Study, and conducted a comparative analysis of population statistics, dementia as a priority  
35 health area, and dementia incidence rates, death rates and disability-adjusted life years  
36 (DALYs) in 8 South Asian countries – Afghanistan, Bangladesh, Bhutan, India, Maldives, Nepal,  
37 Pakistan and Sri Lanka. Our analysis reiterated that there are limited resources dedicated to  
38 dementia in this region. Sri Lanka and Afghanistan had the highest dementia crude rates and  
39 age-standardized rates, respectively. The burden of dementia in some South Asian countries  
40 was comparable to estimated global averages, and was largely driven by population aging.  
41 Analyses of available data on known biological, behavioral, environmental and disease risk  
42 factors, highlighted the role of metabolic risk factors such as high fasting blood glucose. Here,  
43 we also underscore the critical need for future follow-up longitudinal studies focusing on brain  
44 aging and dementia and describe a roadmap for designing them - taking into account cultural,  
45 economic and public health dynamics that may be uniquely applicable to countries in South  
46 Asia.

47

48

49

50

51

52

53 **KEY MESSAGE**

54 Very few resources are dedicated to dementia care and research in South Asia, in spite of high  
55 burden in some countries. We examine publicly available global health data to highlight that  
56 metabolic dysfunction plays a critical role in dementia risk and also detail considerations for  
57 future follow-up programs aiming to study dementia in South Asia.

58

59

60

61

62

63

64

65

66

67

68

69

70

71

72

73

74

75

76

77

78

79 **INTRODUCTION**

80 Aging results in multiple morphological and biochemical changes in the central and peripheral  
81 nervous systems. In some individuals, these changes may ultimately lead to dementia [1] -  
82 characterized by loss of function in brain regions responsible for visuo-spatial memory,  
83 orientation, thinking, learning, language skills and reasoning [2]. While aging is the strongest  
84 risk factor for dementia, the likelihood of developing the disease is exacerbated by other  
85 behavioral, biological, genetic and environmental factors [3]. Modifiable risk factors of dementia  
86 include low physical activity, obesity, tobacco smoking, alcohol consumption and unhealthy  
87 eating habits. Dementia is caused by and includes several conditions [4], e.g., Alzheimer's  
88 disease, Vascular disease, Lewy body disease, Frontotemporal dementia, Alcohol-related  
89 dementia, HIV-related dementia and Brain injury-related dementia. This debilitating disease is  
90 characterized by progressive loss of cognitive capacity which leads to increased dependency,  
91 reduced quality of life and mortality [5] [6]. There are no cures for this disease, and currently,  
92 most treatments only focus on symptom management [7].

93  
94 The Global Burden of Disease (GBD) 2019 study estimated staggering increases in dementia  
95 rates worldwide over the next few decades [8]. Out of these, low-and-middle-income (LMIC)  
96 countries may experience very high financial burden due to dementia [9]. While population  
97 growth and aging play a substantial role in this, the poor control of risk factors stemming from  
98 lack of awareness, absence of resources and limited research efforts on aging populations may  
99 be contributing to this trend [10][11]. Much remains unknown about regional and country-  
100 specific dementia statistics and determinants – which are most relevant to policy related  
101 decision-making.

102  
103 South Asia is currently the most highly and densely populated region of the world. It is estimated  
104 that over 2 billion people live in South Asia, which accounts for more than 25% of the world's

105 population at present. Despite significant economic advancements made in some countries,  
106 South Asia has one of the lowest Gross Domestic Product (GDP) per capita in the world  
107 (\$2000) [12]. A significant proportion of these people are part of a rapidly aging population [13]  
108 where one in five adults will be over the age of 65 by 2050 in South Asia. Many South Asian  
109 countries are still deeply plagued by communicable diseases. However, with rapidly increasing  
110 industrialization, many regions of South Asia are quickly becoming epicenters for aging-related  
111 chronic diseases, e.g., heart disease, diabetes mellitus and cancer [14]. Previous studies have  
112 already identified risk factors for chronic diseases in South Asian populations, e.g.,  
113 hypertension, hyperglycemia and hypercholesterolemia [15][16][17], which may co-occur in  
114 individuals as they age. Other studies have also identified genetic factors that appear to strongly  
115 contribute to disease phenotypes observed amongst South Asian populations [18][19]. Yet, so  
116 much more remain unknown about biological and demographic factors driving health in this part  
117 of the world.

118  
119 According to early reports, the burden of dementia in South Asia is substantial but health policy,  
120 awareness, and research areas do not adequately address this pressing need. Even though  
121 South Asian countries are typically aggregated in global health classifications, there is high  
122 variability and diversity in individual health status, determinants and trends. Therefore, it is  
123 important to examine country-specific dementia data. Such an approach can also lead to the  
124 identification of potential hotspots for disease and its burden which can help with targeted  
125 disease mitigation efforts. Importantly, it can also help quantify the burden of dementia at  
126 different levels, e.g., individuals, caregivers, health sectors and community. In the present study,  
127 we examined dementia-related data from multiple public sources to explore and compare the  
128 status of the disease as well as risk factors that may be contributing to disease outcomes  
129 between different countries.

130

131 **METHODS**

132 **Definitions**

133 South Asia was defined according to the World Bank classification of countries which includes  
134 Afghanistan, Bangladesh, Bhutan, India, Maldives, Nepal, Pakistan and Sri Lanka [20].

135 For the present study, the standard definitions of dementia were used as per the GBD 2019  
136 study [21]. It used the Diagnostic and Statistical Manual of Mental Disorders (DSM)-III, DSM-III-  
137 R, DSM-IV, or DSM-5, or the International Classification of Diseases (ICD)-8, ICD-9, ICD-10 in  
138 representative surveys for dementia cases. This is based on the WHO definition of dementia -  
139 an umbrella term used to refer to several diseases affecting memory, other cognitive abilities,  
140 and behavior that interfere with a person's ability to maintain their activities of daily living. This  
141 definition includes Alzheimer's disease, vascular dementia, dementia with Lewy bodies,  
142 frontotemporal dementia and dementia that develops because of HIV, alcohol abuse, brain  
143 injury and nutritional deficiencies.

144 **Datasets**

145 *US Census data:* Global demographic data were accessed through the international database of  
146 the census.gov website [22]. With this publicly available database, demographic measures of  
147 200 countries can be accessed. Data from censuses, administrative records, vital statistics and  
148 National statistical offices of countries are compiled here. For the present analysis, we  
149 examined total population, population density, life expectancy at birth, dependency ratio for 65+  
150 and percentage of 65+ year-old people in total population.

151 *WHO Global Dementia Observatory data:* Through this data and knowledge exchange platform  
152 [23], access to key dementia data from 62 participating countries on policies, service delivery,  
153 information and research is provided. For the present analysis, we examined whether each  
154 South Asian country has a dementia national plan, contributes to the dementia observatory and  
155 the availability and status of dementia reporting in the past two years (2017-2019).

156 *Global Burden of Disease (GBD) 2019*: Dementia incidence, death and disability-adjusted life  
157 years (DALY) rates data as well as risk factor data used in the current study were obtained from  
158 the Global Health Data Exchange (GHDx) Query Tool [24]. Detailed methods of the GBD 2019  
159 Study have been published previously [21]. Original sources of GBD data include administrative  
160 sources, vital registries, disease registries, census/surveys, surveillance systems, hospital  
161 records, environmental and geospatial monitors, and scientific literature. Original data from  
162 multiple sources are compiled, corrected for known biases, entered into a database and passed  
163 through statistical modeling pipelines (e.g., Space-time and Gaussian Process Regression) that  
164 allow for comparison between countries. Modeling and estimate methods are used when  
165 reliable statistics cannot be obtained or are missing. Several improvements to the GBD study's  
166 data collection and compilation methods have been made since its inception [25]. Since data  
167 are publicly available estimates from deidentified sources, informed consent was not applicable.  
168 GBD study complies with the Guidelines for Accurate and Transparent Health Estimates  
169 Reporting (GATHER) [26].

#### 170 **Risk factors**

171 Six behavioral, metabolic and environmental risk factors (low physical activity, tobacco use,  
172 alcohol use, obesity, hypertension, and air pollution) and three disease risk factors (diabetes  
173 mellitus, depression, hearing loss) were examined through the Global Health Data Exchange  
174 (GHDx) Query Tool [24]. These were selected based on current knowledge and prior literature  
175 on dementia risk factors [27][28][29][30][31][32][33]. Tobacco included smoking, chewing  
176 tobacco and secondhand smoking. Obesity and hypertension were examined through high body  
177 mass index and high systolic blood pressure, respectively. Air pollution included particulate  
178 matter pollution which consisted of ambient particulate matter pollution, household air pollution  
179 from solid fuels and ambient ozone pollution. Diabetes mellitus in this analysis included both  
180 type 1 and type 2 diabetes. Depression for the purpose of this analysis included depressive  
181 disorders – Major depressive disorder and Dysthymia. No definitive diagnosis criteria or

182 harmonization methods are used in the original data sources and therefore, GBD-determined  
183 definitions of the listed risk factors and conditions were used in the present analysis.

#### 184 **Data and statistical analysis**

185 We examined point estimate numbers (with 95% uncertainty intervals, UI) for crude and age-  
186 standardized death rates, incidence rates and DALY rates for dementia in Afghanistan,  
187 Bangladesh, Bhutan, India, Maldives, Nepal, Pakistan and Sri Lanka. South Asia and global  
188 average estimates were also calculated for comparison purposes. Sex-specific and aggregated  
189 data were both examined. We also used GBD 2019 data to examine rates of risk factors related  
190 to chronic disease in South Asian countries – low physical activity, tobacco use, alcohol use,  
191 obesity, hypertension, diabetes mellitus, depression, hearing loss, and air pollution – that  
192 previous studies have identified as relevant risk factors for dementia [34]. All ages and age-  
193 standardized DALY rates data pertaining to all-cause contribution of these risk factors were  
194 extracted. The contribution and distribution of these risk factors for each South Asian nation was  
195 then computed. Linear regression analysis was employed to examine the relationships between  
196 the risk factors (independent variables) and dementia (dependent variable). Assumptions for  
197 linearity and normality of data were examined. Pearson correlation coefficients (R-values) and  
198 statistical significance (p-values) were computed.  $p < 0.05$  was considered statistically significant.  
199 All data were analyzed using python programming language.

200

## 201 **RESULTS AND DISCUSSION**

### 202 **Population and aging statistics, and dementia as a health priority in South Asia**

203 India was the most populated country in South Asia at the time of this analysis, with  
204 approximately 1.4 billion people, followed by Pakistan and Bangladesh (**Table 1**). Maldives was  
205 the least populated but most densely populated South Asian country. Dementia is strongly  
206 correlated with advanced age, therefore, life expectancies and proportion of older adults in  
207 different countries were examined. Life expectancy at birth was highest in Maldives (77.4 years)



208 followed by Sri Lanka (76.8 years). Life expectancy at birth was lowest in Afghanistan (54.4  
209 years), likely due to high maternal mortality rates, high prevalence of infectious disease and  
210 armed conflicts [35]. The percentage of older adults (individuals who were 65 years or older)  
211 was highest in Sri Lanka (12.4%), almost two-times higher than other South Asian countries.  
212 The lowest percentage of older adults was in Afghanistan (2.9%).

213  
214 Setting and following a national-level agenda to assess dementia is an essential component of  
215 improving outcomes related to it [34]. Collectively, most LMICs in the world have poor or non-  
216 existing policies related to dementia. Compared to other regions of the world, there is limited  
217 investment into brain aging and dementia initiatives in South Asia. No countries in South Asia  
218 currently have a national plan on dementia. Only 4 South Asian countries (Bangladesh, India,  
219 Maldives, Pakistan) out of the 8 currently participate in the WHO Global Dementia Observatory  
220 **(Table 2)**. Even in the 4 countries that participate in the WHO Global Dementia Observatory, no  
221 dementia data had been compiled in a report between the period of 2017-2019. The status of  
222 other areas related to dementia awareness, dementia risk reduction, diagnosis, treatment and  
223 care, dementia carer support, dementia information systems and research is also similar across  
224 these countries highlighting an urgent need for action. Prior reports indicate that there are  
225 barriers to dementia assessment and care – stigma about dementia, poor patient engagement,  
226 limited trained healthcare professionals who can diagnose and manage dementia, competing  
227 healthcare system priorities and insufficient funding [36]. Studies have also identified the  
228 importance of establishing research priorities to improve outcomes related to dementia [37].  
229 Research priorities identified are focused on prevention, reduction of dementia risk, delivery and  
230 quality of life and care for people with dementia and their caregivers. Other priorities identified  
231 were related to diagnosis, biomarkers, treatment development, basic research into disease  
232 mechanisms and public awareness of dementia. The South Asian region appears to lack in a  
233 majority of these areas owing to poor prioritization of dementia as a public health concern.

234 **Incidence, deaths and DALYs from all-cause dementia in South Asia**

235 Using GBD 2019 data, crude and age-standardized rates of dementia in South Asian nations  
236 were considered (**Table 3, Figure 1**). The crude death rates in South Asian countries were  
237 lower than the global average (20.98 per 100,000) (**Figure 1A**). Amongst South Asian nations,  
238 Sri Lanka showed the highest death rate (18.95 per 100,000). This was much higher than the  
239 South Asia mean (9.48 per 100,000). Age-standardized death rates in some South Asian  
240 countries (Afghanistan and Sri Lanka) were higher than the South Asia and global average  
241 (**Figure 1B**). Within South Asian countries, Afghanistan showed the highest age-standardized  
242 deaths (30.79 per 100,000) followed by Sri Lanka (23.53 per 100,000). Incidence rates of  
243 dementia in South Asia showed similar patterns. Crude incidence rate was highest in Sri Lanka  
244 (84.32 per 100,000) which was slightly lower than the estimated global average (93.52 per  
245 100,000) (**Figure 1C**). Age-standardized incidence rate was highest in Afghanistan (109.39 per  
246 100,000) which was much higher than the global average (94.99 per 100,000), followed by Sri  
247 Lanka (86.29 per 100,000) (**Figure 1D**). Maldives also showed a relatively high age-adjusted  
248 incidence rate of dementia (86.00 per 100,000). For DALYs, highest crude rates were seen in  
249 Sri Lanka (321.52 per 100,000) which was slightly lower than the global average (326.68 per  
250 100,000) (**Figure 1E**). The highest age-standardized DALY rates were observed in Afghanistan  
251 (432.72 per 100,000) followed by Sri Lanka (342.98 per 100,000) (**Figure 1F**). Both of these  
252 were higher than the global age-standardized DALY rates (338.68 per 1500,000). Prevalence  
253 rates were not examined in depth in the present study. GBD 2019 estimates show the highest  
254 crude prevalence for Sri Lanka 0.63% which is comparable to the global prevalence (0.69%).

255  
256 It is important to highlight the absence of definitive diagnosis criteria leading to underreporting  
257 when compiling large amounts of global health data from various sources in the GBD project.  
258 For example, dementia is typically diagnosed using cognitive testing (e.g., Montreal Cognitive  
259 Assessment, Mini Mental State Examination), brain imaging (e.g., magnetic resonance imaging)

260 blood or cerebrospinal fluid (CSF) tests (e.g., amyloid  $\beta$  or p-tau levels) and others. It is difficult  
261 to ascertain which method was used in aggregated data. Due to absence of technology and  
262 infrastructure, brain MRI or blood/ CSF tests might not be available in many low-income settings  
263 so it is likely that cognitive and neurophysiological evaluations are prioritized but they may have  
264 limited sensitivity in case detections. Therefore, these broad estimates must be followed up with  
265 in-depth studies in order to accurately quantify dementia levels in each population. Previous  
266 independent reports that assessed dementia rates in locally-conducted community-based cohort  
267 studies show prevalence rates in South Asian nations – 8% in Bangladesh [38], 7.4% in India  
268 [39], and 4% in Sri Lanka according to a report from 2003 [40].

269  
270 Sex-specific analysis showed that the burden of dementia in South Asian countries was higher  
271 amongst females than males (data not shown). This is an observation that has been made  
272 elsewhere in the world as well where females are disproportionately affected by the disease  
273 [41]. Mechanisms behind this are not fully understood but differential life course exposures and  
274 metabolic changes that occur during midlife, and menopause appear to play a role [42] [43].  
275 Females also have longer lifespans on average compared to males which may further  
276 contribute to this.

277  
278 Overall, within South Asian countries, the highest crude rates of deaths, incidence and DALYs  
279 related to dementia were seen in Sri Lanka while the highest age-standardized rates were  
280 observed in Afghanistan, followed by Sri Lanka and Maldives. These findings indicate that  
281 population aging likely plays a substantial role in the dementia burden in South Asia similar to  
282 other parts of the world [44]. Previous studies have shown that aging is the strongest predictor  
283 of dementia [45], and findings from this analysis also emphasize this within the context of South  
284 Asia. As a result, countries with higher proportions of older adults in this age range may  
285 experience a disproportionately higher burden of dementia. Age-specific analyses showed an

286 age-dependent increase in dementia deaths, incidence and burden rates in all 8 South Asian  
287 countries as well as globally (data not shown). Dementia rates were higher in younger age  
288 groups in Sri Lanka, compared to Afghanistan (data not shown). Overall, this may also  
289 contribute to higher crude dementia rates observed in Sri Lanka. However, the total rates of  
290 dementia were much higher in older age groups across all countries.

291 There also may be other factors that can contribute to the high dementia burden, in addition to  
292 population aging. A recent study showed that multidimensional poverty is associated with  
293 dementia in Afghanistan [46]. The main contributors identified during this study were education,  
294 employment, health and living conditions. Prior research has shown that trauma is linked to poor  
295 mental health outcomes, e.g., post-traumatic stress disorder and dementia amongst US  
296 Veterans [47]. Whether this phenomena specifically applies to countries in South Asia that have  
297 been in armed conflicts - Afghanistan and Sri Lanka, is currently unknown. Another  
298 consideration is how countries are geographically located, and are categorized as a result.  
299 Afghanistan is geographically close to the Middle East and North African (MENA) region, and is  
300 often considered a middle eastern nation according to some classifications, including the GBD  
301 project. Studies have shown that the prevalence of dementia is very high in the MENA region  
302 [48]. How these geographical factors contribute to dementia data of individual countries,  
303 particularly where data are sparse or missing, can only be fully ascertained by examining high-  
304 quality, country-specific data in rigorous follow-up studies [49].

305

### 306 **Etiological factors driving dementia in South Asia**

307 We interrogated GBD 2019 study data to ascertain whether there were any dementia risk  
308 factors that were prevalent in South Asian countries. There are a few known risk factors of  
309 dementia – air pollution, alcohol use, high BMI, high fasting blood glucose, high systolic blood  
310 pressure, low physical activity, tobacco, hearing loss, depressive disorders and diabetes  
311 mellitus, amongst others. The GBD 2019 study identified smoking, high body-mass index and

312 high fasting plasma glucose as the major risk factors contributing to global dementia burden  
313 [21]. We examined crude and age-standardized DALY rates for each risk factor available  
314 through the GBD 2019 study for each South Asian nation. There were appreciable similarities  
315 as well as differences in crude and age-standardized DALYs associated with various risk factors  
316 within different South Asian nations. High systolic blood pressure and high fasting blood glucose  
317 appeared to be notable contributors for the overall burden across South Asian populations  
318 **(Figure 2)**. In some nations, other risk factors were more prominent. For example, air pollution  
319 made up a large proportion of the contributing risk in Nepal, India and Bangladesh while  
320 Diabetes Mellitus was disproportionately higher in Sri Lanka. These findings indicate that while  
321 there might be common drivers relevant to dementia in different South Asian nations, the  
322 burden might be modified by country-specific, unique risk factors as well. The exact contribution  
323 of each risk factor to dementia burden specifically was not analyzed here as the goal was to  
324 compare the prominence of well-established dementia risk factors in each South Asian nation.  
325  
326 In order to understand the relationship between these risk factors and dementia within South  
327 Asia, a linear regression analysis was conducted where Pearson correlation coefficients (R-  
328 value) and p-values were computed. For crude DALYs, the strongest positive significant  
329 correlations for dementia were observed with age-related and other hearing loss (R=0.87,  
330 p=0.01), Diabetes Mellitus (R=0.85, p=0.01) and high fasting blood glucose (R=0.74, p=0.04)  
331 **(Table 4)**. A moderate correlation was observed for alcohol use (R=0.67, p=0.07) which was not  
332 statistically significant. For age-standardized DALYs, the strongest correlations for dementia  
333 were seen with low physical activity (R=0.78, p=0.02) and high BMI (R=0.78, p=0.02) and high  
334 fasting blood glucose (R=0.77, p=0.03). In addition, high systolic blood pressure (R=0.64,  
335 p=0.09) and Diabetes Mellitus (R=0.52, p=0.19) also showed noteworthy correlations which  
336 were not statistically significant. An important point to note is that many of these risk factors also  
337 exhibit strong correlations with each other (data not shown), which can have a direct bearing on

338 the results. For example, high fasting glucose and Diabetes Mellitus are very strongly correlated  
339 ( $R=0.97$ , crude rate and  $R=0.78$ , age-standardized rate). Therefore, ascertaining the exact  
340 causal role of a given risk factor on dementia is not possible through an analysis of this nature.  
341 Future analyses should consider this, where advanced statistical models may be more useful.  
342 Collectively, the findings from this study align closely with other studies showing that metabolic  
343 risk factors, particularly hyperglycemia, play an important role in dementia incidence and  
344 progression [50][51]. Preventing and controlling metabolic dysfunction should therefore be an  
345 urgent priority for South Asians in order to prevent and control a host of chronic diseases,  
346 including dementia [52].

347  
348 Other studies have also shown that of some of these metabolic risk factors are abundantly  
349 prevalent in some South Asian countries. A recent publication by an independent group showed  
350 that the prevalence of type 2 diabetes amongst Sri Lankans is 23% [53]. The same group  
351 showed that the prevalence of prediabetes is 30.5%. These levels are significantly higher than  
352 the global average and other countries in the Asia Pacific region [54]. The exact reasons for the  
353 high prevalence of metabolic risk factors in South Asian countries is not fully understood but  
354 poor diets, lack of physical activity, genetic predispositions and life course factors, e.g.,  
355 biological programming may all be contributing [55].

356  
357 However, it is important to note that there are several other dementia risk factors that were not  
358 considered here. For example, low educational attainment has been associated with poorer  
359 dementia outcomes in previous studies [56]. Vision loss and muscle strength are also emerging  
360 as predictors of dementia [57][58]. Even though some of these data are not challenging to  
361 collect, many of them are not been considered in population-level studies leading to missed  
362 opportunities to better understand dementia determinants. There are other risk factors that are  
363 more costly to measure and therefore might not be feasible to measure in low income and

364 population-level settings. For example, genetic factors such as apolipoprotein E  $\epsilon$ 4 (APOE  $\epsilon$ 4) is  
365 also strongly linked with dementia incidence and progression [59] but requires laboratory-based  
366 genotyping. Due to absence of appropriate current data, these factors could not be considered  
367 in the present analysis.

368

### 369 **The need for more data**

370 The GBD Study is a useful resource to identify global health trends and patterns that can help  
371 drive policy focus [49]. These data are largely based on estimates arrived at through various  
372 statistical models. These data are also compiled from thousands of different sources which may  
373 lead to underreporting, and missing data for some countries. Furthermore, some conditions are  
374 aggregated together in the GBD which may affect the findings presented here. For example, in  
375 the GBD, hearing loss that is aging-related and other causes-related are combined. Aging-  
376 associated hearing loss is a strong predictor of dementia but by merging these data with other  
377 types of hearing loss, some trends may be lost. In the absence of data collected through local  
378 studies, which is often the case with LMIC countries, sources such as the GBD provide valuable  
379 starting points for health trend analyses. However, the need for further research on unique  
380 factors that may drive dementia and also trajectories of dementia trends in individual countries  
381 is pressing. For example, there is also very limited data on mild cognitive impairment (MCI) and  
382 how cognitive decline progresses as individuals age in South Asia. Furthermore, there's also  
383 poor understanding of the different types of dementia in the region. The paucity of reliable data  
384 from this region has been previously noted for many years [60].

385

### 386 **Considerations for future studies**

387 Findings from broad, large global health projects must be followed up using more specific  
388 analyses that focus on interrogating observations made. Several unique challenges must be  
389 overcome when planning and executing longitudinal follow-up studies aiming to characterize

390 brain aging and dementia in South Asian countries. These include financial, cultural and  
391 structural barriers. **Figure 3** highlights major considerations applicable to countries in South  
392 Asia, as well as others that are LMIC. Most countries in South Asia have limited medical  
393 research funding, which poses a major problem for establishing state-funded programs that are  
394 sustainable and continuous. However, overcoming these initial barriers through strategic  
395 partnerships, can help set up powerful data and biological sample repositories that can also  
396 serve as strong platforms for research, training, education and public awareness. Establishing  
397 standard definitions and diagnostic criteria for dementia as well as utilizing biomarkers, both  
398 behavioral and imaging are important. These long-term studies can also add immense value to  
399 overall understanding of dementia and risk factors, ultimately paving the way for prevention and  
400 therapeutic strategies that encompass global populations.

401  
402 Such follow-up, focused studies have shown that dementia rates in some South Asian countries  
403 have historically been underestimated due to underdiagnoses and underreporting. For example,  
404 a recent report showed that there are a few million more cases of dementia in India than  
405 previously estimated [39]. This is likely the case for many other LMICs that don't have dedicated  
406 resources to track and monitor the status of aging-associated conditions like dementia. This can  
407 be exacerbated by classifying dementia as a normal part of the aging process. It is also  
408 noteworthy that the COVID-19 pandemic has negatively affected diagnosis, management and  
409 research related to dementia in many South Asian countries. Additionally, country-specific  
410 concerns have also significantly worsened the dementia burden. For example, Sri Lanka was hit  
411 by an economic crisis in 2022, leading to serious financial and societal issues that have  
412 invariably affected the health sector. The exact magnitude of this crisis and its effects on  
413 particularly human health outcomes is unknown.

414



415 There are also specific cultural, religious and language factors that must be considered when  
416 examining dementia burden in South Asia. Most South Asian countries promote strong family  
417 structures, and therefore, have multi-generational households where older adults live with  
418 younger individuals. When older adults are diagnosed with dementia, caretaking responsibilities  
419 may be taken up by younger members of the family due to value systems. Not being adequately  
420 equipped and trained to care for a dementia patient can lead to a significant caregiver burden  
421 [61][62]. South Asian countries also do not have formal caregiver structures in place, e.g.,  
422 nursing homes, social workers, community-based healthcare teams, which are essential to  
423 effectively reducing overall burden of dementia. Reliable data on caregiver systems are also  
424 sparse in South Asian countries and are not addressed in large studies such as the GDB. The  
425 present study did not examine dementia burden amongst South Asians who live in other parts of  
426 the world [63]. In spite of dementia outcomes being better in high income countries, South  
427 Asians living in these parts of the world may experience bias and discrimination when seeking  
428 dementia-related care [64]. There's also dementia-related stigma within South Asian  
429 communities which must be addressed [65].

430  
431 With rapidly growing older adult populations, these concerns are expected to magnify and  
432 countries that are not prepared will likely experience the heaviest financial, societal and public  
433 health burden. Efforts dedicated to accurately measuring aging and brain aging biomarkers, and  
434 also dementia statistics and determinants are vital first steps that must be undertaken in order to  
435 understand the true situation of dementia in these countries. Through this, contributing risk  
436 factors can be identified so that they can be controlled, where possible, ultimately leading to  
437 improved outcomes related to dementia. Follow-up studies can also help facilitate the a better  
438 understanding of dementia subtypes, timelines, and molecular targets that may be critical for  
439 identifying therapeutic interventions in the future.

440

441 **CONCLUSIONS**

442 In this preliminary summary analysis using publicly available dementia data, we highlight the  
443 status and determinants of dementia burden in 8 South Asian nations. Our findings highlight that  
444 South Asian countries are lagging behind other regions with regard to prioritization of brain  
445 aging and dementia as healthcare and research items that require urgent attention. Sri Lanka  
446 (highest proportion of older adults in South Asia) and Afghanistan (lowest proportion of older  
447 adults in South Asia) are experiencing the most significant burden of dementia, driven by  
448 population aging and other factors, respectively. We also identify that metabolic dysfunction  
449 strongly contributes to the dementia burden in South Asian countries. Overall, this analysis  
450 emphasizes the need for country-specific, longitudinally-collected data on risk factors and  
451 biomarkers of dementia in South Asia. Therefore, prioritizing research, awareness and services  
452 related to dementia can help South Asian countries prepare for the impending public health  
453 challenges related to population aging.

454

455

456

457

458

459

460

461

462

463

464

465

466

467 **DATA AVAILABILITY AND SHARING**

468 All raw data can be downloaded from primary, publicly available data sources listed in the  
469 manuscript. All analyzed data and codes used for analysis are available upon request from  
470 corresponding author.

471

472 **AUTHOR CONTRIBUTIONS**

473 DLP; Planning the study - DLP, NP; Compiling, curating and analyzing data - DLP, NP, SL,  
474 CVLT, NMA, US, CA, SJ, CD; Discussion, data interpretation, proofreading and editing - DLP;  
475 Writing original draft and supervision.

476

477 **ACKNOWLEDGEMENTS**

478 The authors would like to acknowledge the primary data sources – US Census, WHO Global  
479 Dementia Observatory and the Institute for Health Metrics and Evaluation (IHME). We are also  
480 grateful to Professor Vajira HW Dissanayake, Dean of University of Colombo Faculty of  
481 Medicine for his support and Texas Tech University Innovation Hub for their ongoing assistance  
482 of our work.

483

484 **FUNDING STATEMENT**

485 No funding sources to declare

486

487

488 **COMPETING INTERESTS**

489

490 None

491

492

493

494

495

496

497

498 **REFERENCES**

499  
500 1. Qiu C, Fratiglioni L. Aging without Dementia is Achievable: Current Evidence from  
501 Epidemiological Research. *J Alzheimers Dis.* 2018;62(3):933-942. doi: 10.3233/JAD-  
502 171037. PMID: 29562544; PMCID: PMC5870011.  
503 2. Arvanitakis Z, Shah RC, Bennett DA. Diagnosis and Management of Dementia: Review.  
504 *JAMA.* 2019 Oct 22;322(16):1589-1599. doi: 10.1001/jama.2019.4782. PMID:  
505 31638686; PMCID: PMC7462122.  
506 3. Livingston G, Huntley J, Sommerlad A, Ames D, Ballard C, Banerjee S, Brayne C, Burns  
507 A, Cohen-Mansfield J, Cooper C, Costafreda SG, Dias A, Fox N, Gitlin LN, Howard R,  
508 Kales HC, Kivimäki M, Larson EB, Ogunniyi A, Orgeta V, Ritchie K, Rockwood K,  
509 Sampson EL, Samus Q, Schneider LS, Selbæk G, Teri L, Mukadam N. Dementia  
510 prevention, intervention, and care: 2020 report of the Lancet Commission. *Lancet.* 2020  
511 Aug 8;396(10248):413-446. doi: 10.1016/S0140-6736(20)30367-6. Epub 2020 Jul 30.  
512 Erratum in: *Lancet.* 2023 Sep 30;402(10408):1132. PMID: 32738937; PMCID:  
513 PMC7392084.  
514 4. Chiu MJ, Chen TF, Yip PK, Hua MS, Tang LY. Behavioral and psychologic symptoms in  
515 different types of dementia. *J Formos Med Assoc.* 2006 Jul;105(7):556-62. doi:  
516 10.1016/S0929-6646(09)60150-9. PMID: 16877235.  
517 5. Kahle-Wroblewski K, Andrews JS, Belger M, Ye W, Gauthier S, Rentz DM, Galasko D.  
518 Dependence Levels as Interim Clinical Milestones Along the Continuum of Alzheimer's  
519 Disease: 18-Month Results from the GERAS Observational Study. *J Prev Alzheimers*  
520 *Dis.* 2017;4(2):72-80. doi: 10.14283/jpad.2017.2. PMID: 29186278; PMCID:  
521 PMC5912689.  
522 6. Guehne U, Riedel-Heller S, Angermeyer MC. Mortality in dementia. *Neuroepidemiology.*  
523 2005;25(3):153-62. doi: 10.1159/000086680. Epub 2005 Jun 29. PMID: 15990446.  
524 7. Tisher A, Salardini A. A Comprehensive Update on Treatment of Dementia. *Semin*  
525 *Neurol.* 2019 Apr;39(2):167-178. doi: 10.1055/s-0039-1683408. Epub 2019 Mar 29.  
526 PMID: 30925610.  
527 8. GBD 2019 Dementia Forecasting Collaborators. Estimation of the global prevalence of  
528 dementia in 2019 and forecasted prevalence in 2050: an analysis for the Global Burden  
529 of Disease Study 2019. *Lancet Public Health.* 2022 Feb;7(2):e105-e125. doi:  
530 10.1016/S2468-2667(21)00249-8. Epub 2022 Jan 6. PMID: 34998485; PMCID:  
531 PMC8810394.  
532 9. Mattap SM, Mohan D, McGrattan AM, Allotey P, Stephan BC, Reidpath DD, Siervo M,  
533 Robinson L, Chaiyakunapruk N. The economic burden of dementia in low- and middle-  
534 income countries (LMICs): a systematic review. *BMJ Glob Health.* 2022  
535 Apr;7(4):e007409. doi: 10.1136/bmjgh-2021-007409. PMID: 35379735; PMCID:  
536 PMC8981345.  
537 10. Mukadam N, Sommerlad A, Huntley J, Livingston G. Population attributable fractions for  
538 risk factors for dementia in low-income and middle-income countries: an analysis using  
539 cross-sectional survey data. *Lancet Glob Health.* 2019 May;7(5):e596-e603. doi:  
540 10.1016/S2214-109X(19)30074-9. PMID: 31000129.  
541 11. Prince M, Acosta D, Albanese E, Arizaga R, Ferri CP, Guerra M, Huang Y, Jacob KS,  
542 Jimenez-Velazquez IZ, Rodriguez JL, Salas A, Sosa AL, Sousa R, Uwakwe R, van der  
543 Poel R, Williams J, Wortmann M. Ageing and dementia in low and middle income  
544 countries-Using research to engage with public and policy makers. *Int Rev Psychiatry.*  
545 2008 Aug;20(4):332-43. doi: 10.1080/09540260802094712. PMID: 18925482; PMCID:  
546 PMC2582830.

- 547 12. World Economic Situation and Prospects Report 2019. Last accessed February 4<sup>th</sup>,  
548 2024. [https://www.un.org/development/desa/dpad/wp-](https://www.un.org/development/desa/dpad/wp-content/uploads/sites/45/WESP2019_BOOK-CH3-5-south-asia-en.pdf)  
549 [content/uploads/sites/45/WESP2019\\_BOOK-CH3-5-south-asia-en.pdf](https://www.un.org/development/desa/dpad/wp-content/uploads/sites/45/WESP2019_BOOK-CH3-5-south-asia-en.pdf)
- 550 13. Martin LG. The status of South Asia's growing elderly population. *J Cross Cult Gerontol.*  
551 1990 Apr;5(2):93-117. doi: 10.1007/BF00116568. PMID: 24390287.
- 552 14. Singh K, Patel SA, Biswas S, Shivashankar R, Kondal D, Ajay VS, Anjana RM, Fatmi Z,  
553 Ali MK, Kadir MM, Mohan V, Tandon N, Narayan KMV, Prabhakaran D. Multimorbidity in  
554 South Asian adults: prevalence, risk factors and mortality. *J Public Health (Oxf).* 2019  
555 Mar 1;41(1):80-89. doi: 10.1093/pubmed/fdy017. PMID: 29425313; PMCID:  
556 PMC7304513.
- 557 15. Neupane D, McLachlan CS, Sharma R, Gyawali B, Khanal V, Mishra SR, Christensen B,  
558 Kallestrup P. Prevalence of hypertension in member countries of South Asian  
559 Association for Regional Cooperation (SAARC): systematic review and meta-analysis.  
560 *Medicine (Baltimore).* 2014 Sep;93(13):e74. doi: 10.1097/MD.000000000000074.  
561 PMID: 25233326; PMCID: PMC4616265.
- 562 16. Narayan KMV, Kondal D, Daya N, Gujral UP, Mohan D, Patel SA, Shivashankar R,  
563 Anjana RM, Staimez LR, Ali MK, Chang HH, Kadir M, Prabhakaran D, Selvin E, Mohan  
564 V, Tandon N. Incidence and pathophysiology of diabetes in South Asian adults living in  
565 India and Pakistan compared with US blacks and whites. *BMJ Open Diabetes Res Care.*  
566 2021 Mar;9(1):e001927. doi: 10.1136/bmjdr-2020-001927. PMID: 33771764; PMCID:  
567 PMC8006839.
- 568 17. Bilen O, Kamal A, Virani SS. Lipoprotein abnormalities in South Asians and its  
569 association with cardiovascular disease: Current state and future directions. *World J*  
570 *Cardiol.* 2016 Mar 26;8(3):247-57. doi: 10.4330/wjc.v8.i3.247. PMID: 27022456; PMCID:  
571 PMC4807313.
- 572 18. Loh M, Zhang W, Ng HK, Schmid K, Lamri A, Tong L, Ahmad M, Lee JJ, Ng MCY, Petty  
573 LE, Spracklen CN, Takeuchi F, Islam MT, Jasmine F, Kasturiratne A, Kibriya M, Mohlke  
574 KL, Paré G, Prasad G, Shahriar M, Chee ML, de Silva HJ, Engert JC, Gerstein HC, Mani  
575 KR, Sabanayagam C, Vujkovic M, Wickremasinghe AR, Wong TY, Yajnik CS, Yusuf S,  
576 Ahsan H, Bharadwaj D, Anand SS, Below JE, Boehnke M, Bowden DW, Chandak GR,  
577 Cheng CY, Kato N, Mahajan A, Sim X, McCarthy MI, Morris AP, Kooner JS, Saleheen D,  
578 Chambers JC. Identification of genetic effects underlying type 2 diabetes in South Asian  
579 and European populations. *Commun Biol.* 2022 Apr 7;5(1):329. doi: 10.1038/s42003-  
580 022-03248-5. Erratum in: *Commun Biol.* 2022 May 5;5(1):441. PMID: 35393509;  
581 PMCID: PMC8991226.
- 582 19. Kooner JS, Saleheen D, Sim X, Sehmi J, Zhang W, Frossard P, Been LF, Chia KS,  
583 Dimas AS, Hassanali N, Jafar T, Jowett JB, Li X, Radha V, Rees SD, Takeuchi F, Young  
584 R, Aung T, Basit A, Chidambaram M, Das D, Grundberg E, Hedman AK, Hydrie ZI,  
585 Islam M, Khor CC, Kowlessur S, Kristensen MM, Liju S, Lim WY, Matthews DR, Liu J,  
586 Morris AP, Nica AC, Pinidiyapathirage JM, Prokopenko I, Rasheed A, Samuel M, Shah  
587 N, Shera AS, Small KS, Suo C, Wickremasinghe AR, Wong TY, Yang M, Zhang F;  
588 DIAGRAM; MuTHER; Abecasis GR, Barnett AH, Caulfield M, Deloukas P, Frayling TM,  
589 Froguel P, Kato N, Katulanda P, Kelly MA, Liang J, Mohan V, Sanghera DK, Scott J,  
590 Seielstad M, Zimmet PZ, Elliott P, Teo YY, McCarthy MI, Danesh J, Tai ES, Chambers  
591 JC. Genome-wide association study in individuals of South Asian ancestry identifies six  
592 new type 2 diabetes susceptibility loci. *Nat Genet.* 2011 Aug 28;43(10):984-9. doi:  
593 10.1038/ng.921. PMID: 21874001; PMCID: PMC3773920.
- 594 20. The World Bank, South Asia. Last accessed February 6<sup>th</sup> 2024.  
595 <https://www.worldbank.org/en/region/sar>
- 596 21. GBD 2019 Diseases and Injuries Collaborators. Global burden of 369 diseases and  
597 injuries in 204 countries and territories, 1990-2019: a systematic analysis for the Global

- 598 Burden of Disease Study 2019. *Lancet*. 2020 Oct 17;396(10258):1204-1222. doi:  
599 10.1016/S0140-6736(20)30925-9. Erratum in: *Lancet*. 2020 Nov 14;396(10262):1562.  
600 PMID: 33069326; PMCID: PMC7567026.
- 601 22. United States Census Bureau. Last accessed February 6<sup>th</sup>, 2024.  
602 <https://www.census.gov>
- 603 23. World Health Organization (WHO), The Global Dementia Observatory (GDO). Last  
604 accessed February 6<sup>th</sup>, 2024. [https://www.who.int/data/gho/data/themes/global-](https://www.who.int/data/gho/data/themes/global-dementia-observatory-gdo)  
605 [dementia-observatory-gdo](https://www.who.int/data/gho/data/themes/global-dementia-observatory-gdo)
- 606 24. Institute for Health Metrics and Evaluation (IHME), Global Health Data Exchange. Last  
607 accessed February 6<sup>th</sup>, 2024. <https://ghdx.healthdata.org/>
- 608 25. Rudan I, Chan KY. Global health metrics needs collaboration and competition. *Lancet*.  
609 2015 Jan 10;385(9963):92-4. doi: 10.1016/S0140-6736(14)62006-7. Epub 2014 Dec 18.  
610 PMID: 25530441.
- 611 26. Stevens GA, Alkema L, Black RE, Boerma JT, Collins GS, Ezzati M, Grove JT, Hogan  
612 DR, Hogan MC, Horton R, Lawn JE, Marušić A, Mathers CD, Murray CJ, Rudan I,  
613 Salomon JA, Simpson PJ, Vos T, Welch V; (The GATHER Working Group). Guidelines  
614 for Accurate and Transparent Health Estimates Reporting: the GATHER statement.  
615 *Lancet*. 2016 Dec 10;388(10062):e19-e23. doi: 10.1016/S0140-6736(16)30388-9. Epub  
616 2016 Jun 28. PMID: 27371184.
- 617 27. Ahlskog JE, Geda YE, Graff-Radford NR, Petersen RC. Physical exercise as a  
618 preventive or disease-modifying treatment of dementia and brain aging. *Mayo Clin Proc*.  
619 2011 Sep;86(9):876-84. doi: 10.4065/mcp.2011.0252. PMID: 21878600; PMCID:  
620 PMC3258000.
- 621 28. Jia L, Du Y, Chu L, Zhang Z, Li F, Lyu D, Li Y, Li Y, Zhu M, Jiao H, Song Y, Shi Y,  
622 Zhang H, Gong M, Wei C, Tang Y, Fang B, Guo D, Wang F, Zhou A, Chu C, Zuo X, Yu  
623 Y, Yuan Q, Wang W, Li F, Shi S, Yang H, Zhou C, Liao Z, Lv Y, Li Y, Kan M, Zhao H,  
624 Wang S, Yang S, Li H, Liu Z, Wang Q, Qin W, Jia J; COAST Group. Prevalence, risk  
625 factors, and management of dementia and mild cognitive impairment in adults aged 60  
626 years or older in China: a cross-sectional study. *Lancet Public Health*. 2020  
627 Dec;5(12):e661-e671. doi: 10.1016/S2468-2667(20)30185-7. PMID: 33271079.
- 628 29. Silva MVF, Loures CMG, Alves LCV, de Souza LC, Borges KBG, Carvalho MDG.  
629 Alzheimer's disease: risk factors and potentially protective measures. *J Biomed Sci*.  
630 2019 May 9;26(1):33. doi: 10.1186/s12929-019-0524-y. PMID: 31072403; PMCID:  
631 PMC6507104.
- 632 30. Zhao YL, Qu Y, Ou YN, Zhang YR, Tan L, Yu JT. Environmental factors and risks of  
633 cognitive impairment and dementia: A systematic review and meta-analysis. *Ageing Res*  
634 *Rev*. 2021 Dec;72:101504. doi: 10.1016/j.arr.2021.101504. Epub 2021 Oct 29. PMID:  
635 34755643.
- 636 31. Byers AL, Yaffe K. Depression and risk of developing dementia. *Nat Rev Neurol*. 2011  
637 May 3;7(6):323-31. doi: 10.1038/nrneurol.2011.60. PMID: 21537355; PMCID:  
638 PMC3327554.
- 639 32. Griffiths TD, Lad M, Kumar S, Holmes E, McMurray B, Maguire EA, Billig AJ, Sedley W.  
640 How Can Hearing Loss Cause Dementia? *Neuron*. 2020 Nov 11;108(3):401-412. doi:  
641 10.1016/j.neuron.2020.08.003. Epub 2020 Aug 31. PMID: 32871106; PMCID:  
642 PMC7664986.
- 643 33. Biessels GJ, Staekenborg S, Brunner E, Brayne C, Scheltens P. Risk of dementia in  
644 diabetes mellitus: a systematic review. *Lancet Neurol*. 2006 Jan;5(1):64-74. doi:  
645 10.1016/S1474-4422(05)70284-2. Erratum in: *Lancet Neurol*. 2006 Feb;5(2):113. PMID:  
646 16361024.

- 647 34. Global action plan on the public health response to dementia 2017-2025, World Health  
648 Organization, 2017. Last accessed on February 6<sup>th</sup> 2024.  
649 <https://www.who.int/publications/i/item/9789241513487>  
650 35. Najafizada SAM, Bourgeault IL, Labonté R. Social Determinants of Maternal Health in  
651 Afghanistan: A Review. *Cent Asian J Glob Health*. 2017 Mar 20;6(1):240. doi:  
652 10.5195/cajgh.2017.240. PMID: 29138735; PMCID: PMC5675389.
- 653 36. Bernstein Sideman A, Al-Rousan T, Tsoy E, Piña Escudero SD, Pintado-Caipa M,  
654 Kanjanapong S, Mbakile-Mahlanza L, Okada de Oliveira M, De la Cruz-Puebla M,  
655 Zygouris S, Ashour Mohamed A, Ibrahim H, Goode CA, Miller BL, Valcour V, Possin KL.  
656 Facilitators and Barriers to Dementia Assessment and Diagnosis: Perspectives From  
657 Dementia Experts Within a Global Health Context. *Front Neurol*. 2022 Mar  
658 28;13:769360. doi: 10.3389/fneur.2022.769360. PMID: 35418934; PMCID:  
659 PMC8997042.
- 660 37. Shah H, Albanese E, Duggan C, Rudan I, Langa KM, Carrillo MC, Chan KY, Joannette Y,  
661 Prince M, Rossor M, Saxena S, Snyder HM, Sperling R, Varghese M, Wang H,  
662 Wortmann M, Dua T. Research priorities to reduce the global burden of dementia by  
663 2025. *Lancet Neurol*. 2016 Nov;15(12):1285-1294. doi: 10.1016/S1474-4422(16)30235-  
664 6. Epub 2016 Oct 11. PMID: 27751558.
- 665 38. Naheed A, Hakim M, Islam MS, Islam MB, Tang EYH, Prodhan AA, Amin MR, Stephan  
666 BCM, Mohammad QD. Prevalence of dementia among older age people and variation  
667 across different sociodemographic characteristics: a cross-sectional study in  
668 Bangladesh. *Lancet Reg Health Southeast Asia*. 2023 Aug 24;17:100257. doi:  
669 10.1016/j.lansea.2023.100257. PMID: 37849932; PMCID: PMC10577143.
- 670 39. Lee J, Meijer E, Langa KM, Ganguli M, Varghese M, Banerjee J, Khobragade P,  
671 Angrisani M, Kurup R, Chakrabarti SS, Gambhir IS, Koul PA, Goswami D, Talukdar A,  
672 Mohanty RR, Yadati RS, Padmaja M, Sankhe L, Rajguru C, Gupta M, Kumar G, Dhar M,  
673 Chatterjee P, Singhal S, Bansal R, Bajpai S, Desai G, Rao AR, Sivakumar PT, Muliya  
674 KP, Bhatankar S, Chattopadhyay A, Govil D, Pedgaonkar S, Sekher TV, Bloom DE,  
675 Crimmins EM, Dey AB. Prevalence of dementia in India: National and state estimates  
676 from a nationwide study. *Alzheimers Dement*. 2023 Jul;19(7):2898-2912. doi:  
677 10.1002/alz.12928. Epub 2023 Jan 13. PMID: 36637034; PMCID: PMC10338640.
- 678 40. de Silva HA, Gunatilake SB, Smith AD. Prevalence of dementia in a semi-urban  
679 population in Sri Lanka: report from a regional survey. *Int J Geriatr Psychiatry*. 2003  
680 Aug;18(8):711-5. doi: 10.1002/gps.909. PMID: 12891639.
- 681 41. Beam CR, Kaneshiro C, Jang JY, Reynolds CA, Pedersen NL, Gatz M. Differences  
682 Between Women and Men in Incidence Rates of Dementia and Alzheimer's Disease. *J*  
683 *Alzheimers Dis*. 2018;64(4):1077-1083. doi: 10.3233/JAD-180141. PMID: 30010124;  
684 PMCID: PMC6226313.
- 685 42. Yoo JE, Shin DW, Han K, Kim D, Won HS, Lee J, Kim SY, Nam GE, Park HS. Female  
686 reproductive factors and the risk of dementia: a nationwide cohort study. *Eur J Neurol*.  
687 2020 Aug;27(8):1448-1458. doi: 10.1111/ene.14315. Epub 2020 Jun 13. PMID:  
688 32396982.
- 689 43. Cheng CK, Tsao YC, Su YC, Sung FC, Tai HC, Kung WM. Metabolic Risk Factors of  
690 Alzheimer's Disease, Dementia with Lewy Bodies, and Normal Elderly: A Population-  
691 Based Study. *Behav Neurol*. 2018 Jun 3;2018:8312346. doi: 10.1155/2018/8312346.  
692 PMID: 29971140; PMCID: PMC6008802.
- 693 44. Chan A. Aging in Southeast and East Asia: issues and policy directions. *J Cross Cult*  
694 *Gerontol*. 2005 Dec;20(4):269-84. doi: 10.1007/s10823-006-9006-2. PMID: 17072767.
- 695 45. Aronson MK, Ooi WL, Geva DL, Masur D, Blau A, Frishman W. Dementia. Age-  
696 dependent incidence, prevalence, and mortality in the old old. *Arch Intern Med*. 1991  
697 May;151(5):989-92. doi: 10.1001/archinte.151.5.989. PMID: 2025148.

- 698 46. Trani JF, Zhu Y, Park S, Khuram D, Azami R, Fazal MR, Babulal GM. Multidimensional  
699 poverty is associated with dementia among adults in Afghanistan. *EClinicalMedicine*.  
700 2023 Mar 16;58:101906. doi: 10.1016/j.eclinm.2023.101906. PMID: 36969341; PMCID:  
701 PMC10030911.
- 702 47. Yaffe K, Vittinghoff E, Lindquist K, Barnes D, Covinsky KE, Neylan T, Kluse M, Marmar  
703 C. Posttraumatic stress disorder and risk of dementia among US veterans. *Arch Gen*  
704 *Psychiatry*. 2010 Jun;67(6):608-13. doi: 10.1001/archgenpsychiatry.2010.61. PMID:  
705 20530010; PMCID: PMC2933793.
- 706 48. Safiri S, Noori M, Nejadghaderi SA, Mousavi SE, Sullman MJM, Araj-Khodaei M, Collins  
707 GS, Kolahi AA, Gharagozli K. The burden of Alzheimer's disease and other types of  
708 dementia in the Middle East and North Africa region, 1990-2019. *Age Ageing*. 2023 Mar  
709 1;52(3):afad042. doi: 10.1093/ageing/afad042. PMID: 36995136.
- 710 49. Murray CJL. The Global Burden of Disease Study at 30 years. *Nat Med*. 2022  
711 Oct;28(10):2019-2026. doi: 10.1038/s41591-022-01990-1. Epub 2022 Oct 10. PMID:  
712 36216939.
- 713 50. Lee HJ, Seo HI, Cha HY, Yang YJ, Kwon SH, Yang SJ. Diabetes and Alzheimer's  
714 Disease: Mechanisms and Nutritional Aspects. *Clin Nutr Res*. 2018 Oct;7(4):229-240.  
715 doi: 10.7762/cnr.2018.7.4.229. Epub 2018 Oct 23. PMID: 30406052; PMCID:  
716 PMC6209735.
- 717 51. Hamzé R, Delangre E, Tolu S, Moreau M, Janel N, Bailbé D, Movassat J. Type 2  
718 Diabetes Mellitus and Alzheimer's Disease: Shared Molecular Mechanisms and Potential  
719 Common Therapeutic Targets. *Int J Mol Sci*. 2022 Dec 4;23(23):15287. doi:  
720 10.3390/ijms232315287. PMID: 36499613; PMCID: PMC9739879.
- 721 52. Pandit K, Goswami S, Ghosh S, Mukhopadhyay P, Chowdhury S. Metabolic syndrome  
722 in South Asians. *Indian J Endocrinol Metab*. 2012 Jan;16(1):44-55. doi: 10.4103/2230-  
723 8210.91187. PMID: 22276252; PMCID: PMC3263197.
- 724 53. Rannan-Eliya RP, Wijemunige N, Perera P, Kapuge Y, Gunawardana N, Sigera C,  
725 Jayatissa R, Herath HMM, Gamage A, Weerawardena N, Sivagnanam I, Dalpatadu S,  
726 Samarage S, Samarakoon U, Samaranayake N, Pullenayegam C, Perera B; SLHAS  
727 Collaborators. Prevalence of diabetes and pre-diabetes in Sri Lanka: a new global  
728 hotspot-estimates from the Sri Lanka Health and Ageing Survey 2018/2019. *BMJ Open*  
729 *Diabetes Res Care*. 2023 Feb;11(1):e003160. doi: 10.1136/bmjdr-2022-003160. PMID:  
730 36796852; PMCID: PMC9936281.
- 731 54. Saeedi P, Petersohn I, Salpea P, Malanda B, Karuranga S, Unwin N, Colagiuri S,  
732 Guariguata L, Motala AA, Ogurtsova K, Shaw JE, Bright D, Williams R; IDF Diabetes  
733 Atlas Committee. Global and regional diabetes prevalence estimates for 2019 and  
734 projections for 2030 and 2045: Results from the International Diabetes Federation  
735 Diabetes Atlas, 9<sup>th</sup> edition. *Diabetes Res Clin Pract*. 2019 Nov;157:107843. doi:  
736 10.1016/j.diabres.2019.107843. Epub 2019 Sep 10. PMID: 31518657.
- 737 55. Nair M, Prabhakaran D. Why Do South Asians Have High Risk for CAD? *Glob Heart*.  
738 2012 Dec;7(4):307-14. doi: 10.1016/j.gheart.2012.09.001. Epub 2012 Oct 16. PMID:  
739 25689942.
- 740 56. Sharp ES, Gatz M. Relationship between education and dementia: an updated  
741 systematic review. *Alzheimer Dis Assoc Disord*. 2011 Oct-Dec;25(4):289-304. doi:  
742 10.1097/WAD.0b013e318211c83c. PMID: 21750453; PMCID: PMC3193875.
- 743 57. Kuźma E, Littlejohns TJ, Khawaja AP, Llewellyn DJ, Ukoumunne OC, Thiem U. Visual  
744 Impairment, Eye Diseases, and Dementia Risk: A Systematic Review and Meta-  
745 Analysis. *J Alzheimers Dis*. 2021;83(3):1073-1087. doi: 10.3233/JAD-210250. PMID:  
746 34397414.
- 747 58. Moon Y, Moon WJ, Kim JO, Kwon KJ, Han SH. Muscle Strength Is Independently  
748 Related to Brain Atrophy in Patients with Alzheimer's Disease. *Dement Geriatr Cogn*



- 749 Disord. 2019;47(4-6):306-314. doi: 10.1159/000500718. Epub 2019 Jul 16. PMID:  
750 31311027.
- 751 59. Gharbi-Meliani A, Dugravot A, Sabia S, Regy M, Fayosse A, Schnitzler A, Kivimäki M,  
752 Singh-Manoux A, Dumurgier J. The association of APOE ε4 with cognitive function over  
753 the adult life course and incidence of dementia: 20 years follow-up of the Whitehall II  
754 study. *Alzheimers Res Ther.* 2021 Jan 4;13(1):5. doi: 10.1186/s13195-020-00740-0.  
755 PMID: 33397450; PMCID: PMC7784268.
- 756 60. Siegel KR, Patel SA, Ali MK. Non-communicable diseases in South Asia: contemporary  
757 perspectives. *Br Med Bull.* 2014 Sep;111(1):31-44. doi: 10.1093/bmb/ldu018. PMID:  
758 25190759; PMCID: PMC4416117.
- 759 61. Jayakody S, Arambepola C. Patient and caregiver perspectives on quality of life in  
760 dementia: Evidence from a South Asian population. *PLoS One.* 2023 May  
761 18;18(5):e0285701. doi: 10.1371/journal.pone.0285701. PMID: 37200258; PMCID:  
762 PMC10194915.
- 763 62. Jayakody S, Arambepola C. Determinants of quality of life among people with dementia:  
764 evidence from a South Asian population. *BMC Geriatr.* 2022 Sep 12;22(1):745. doi:  
765 10.1186/s12877-022-03443-3. PMID: 36096721; PMCID: PMC9469587.
- 766 63. Mayeda ER, Glymour MM, Quesenberry CP Jr, Whitmer RA. Heterogeneity in 14-year  
767 Dementia Incidence Between Asian American Subgroups. *Alzheimer Dis Assoc Disord.*  
768 2017 Jul-Sep;31(3):181-186. doi: 10.1097/WAD.000000000000189. PMID: 28406845;  
769 PMCID: PMC5568954.
- 770 64. Alzheimer's Association, The patient journey in an era of new treatments, 2023. Last  
771 accessed February 6<sup>th</sup>, 2024. [https://www.alz.org/media/Documents/alzheimers-facts-  
772 and-figures-special-report.pdf](https://www.alz.org/media/Documents/alzheimers-facts-and-figures-special-report.pdf)
- 773 65. Hossain M, Crossland J, Stores R, Dewey A, Hakak Y. Awareness and understanding of  
774 dementia in South Asians: A synthesis of qualitative evidence. *Dementia (London).* 2020  
775 Jul;19(5):1441-1473. doi: 10.1177/1471301218800641. Epub 2018 Oct 8. PMID:  
776 30296834.  
777
- 778
- 779
- 780
- 781
- 782
- 783
- 784
- 785
- 786
- 787
- 788

789 **Tables and Figures**

790  
791  
792  
793  
794  
795  
796  
797  
798  
799  
800  
801  
802  
803  
804  
805  
806  
807  
808  
809  
810  
811  
812  
813  
814  
815  
816  
817  
818  
819  
820  
821  
822  
823  
824  
825  
826  
827  
828  
829  
830  
831  
832  
833  
834  
835  
836  
837  
838  
839

| Country     | Total population | Population density | Life expectancy at birth | Dependency ratio, 65+ years | % of 65+ years |
|-------------|------------------|--------------------|--------------------------|-----------------------------|----------------|
| Afghanistan | 40,121,552       | 61.5               | 54.4                     | 5                           | 2.9            |
| Bangladesh  | 168,697,184      | 1296               | 75.2                     | 11.6                        | 7.8            |
| Bhutan      | 884,546          | 23                 | 73.7                     | 9.5                         | 6.7            |
| India       | 1,409,128,296    | 473.9              | 68.2                     | 9.9                         | 6.8            |
| Maldives    | 388,858          | 1304.9             | 77.4                     | 8.6                         | 6.1            |
| Nepal       | 31,122,387       | 217.1              | 73                       | 9.4                         | 6.4            |
| Pakistan    | 252,363,571      | 327.4              | 70.3                     | 8.1                         | 4.9            |
| Sri Lanka   | 21,982,608       | 340.1              | 76.8                     | 19.1                        | 12.4           |

840  
841  
842  
843  
844  
845  
846  
847  
848  
849  
850  
851  
852  
853  
854  
855  
856  
857  
858  
859  
860  
861  
862  
863  
864  
865  
866  
867  
868  
869  
870  
871  
872  
873  
874  
875  
876  
877  
878  
879  
880  
881  
882  
883

**Table 1.** South Asia statistics on populations and demographics. Data source: US Census Bureau international database (2024). Population density is listed in number of people per km<sup>2</sup>. Life expectancy at birth is listed in years.

884

| Country     | Included in/ contributes to WHO Global Dementia Observatory? | Availability and status of dementia reporting in the past 2 years, 2017-2019 |
|-------------|--------------------------------------------------------------|------------------------------------------------------------------------------|
| Afghanistan | No                                                           | N/A                                                                          |
| Bangladesh  | Yes                                                          | No dementia data have been compiled in a report                              |
| Bhutan      | No                                                           | N/A                                                                          |
| India       | Yes                                                          | No dementia data have been compiled in a report                              |
| Maldives    | Yes                                                          | No dementia data have been compiled in a report                              |
| Nepal       | No                                                           | N/A                                                                          |
| Pakistan    | Yes                                                          | No dementia data have been compiled in a report                              |
| Sri Lanka   | No                                                           | N/A                                                                          |

885

886

**Table 2.** Dementia as a health priority in South Asia. Data source: WHO Global Dementia Observatory (2019).

887

888

889

890

891

892

893

894

895

896

897

898

899

900

901

902

903

904

905

906

907

908

909

910

911

912

913

914

915

916

917

918

919

920

921

922

923

924

925

926

| Country            | Death rate (per 100,000) |                    | Incidence rate (per 100,000) |                       | DALYs rate (per 100,000) |                         |
|--------------------|--------------------------|--------------------|------------------------------|-----------------------|--------------------------|-------------------------|
|                    | All ages                 | Age-standardized   | All ages                     | Age-standardized      | All ages                 | Age-standardized        |
| <b>Afghanistan</b> | 4.64 (1.10-12.54)        | 30.79 (7.46-82.34) | 22.10 (18.56-25.57)          | 109.39 (92.94-125.60) | 80.83 (33.26-192.81)     | 432.72 (179.01-1001.95) |
| <b>Bangladesh</b>  | 9.80 (2.38-27.25)        | 18.23 (4.45-49.29) | 48.14 (41.10-55.88)          | 71.28 (61.06-82.14)   | 166.64 (72.32-377.64)    | 263.10 (114.29-589.70)  |
| <b>Bhutan</b>      | 10.68 (2.56-28.70)       | 21.68 (5.25-57.41) | 41.53 (35.44-47.99)          | 69.41 (59.22-79.62)   | 166.28 68.60-387.64)     | 294.56 (120.22-672.40)  |
| <b>India</b>       | 9.28 (2.24-25.90)        | 19.12 (4.57-52.01) | 38.93 (33.37-44.84)          | 62.29 (53.08-71.43)   | 152.84 (61.32-367.97)    | 260.26 (103.52-616.93)  |
| <b>Maldives</b>    | 9.57 (2.36-24.66)        | 22.70 (5.59-58.33) | 41.34 (35.50-47.11)          | 86.00 (73.41-98.08)   | 156.74 (66.96-351.04)    | 338.10 (145.14-745.14)  |
| <b>Nepal</b>       | 8.05 (1.87-22.50)        | 19.51 (4.53-53.31) | 37.78 (32.57-43.38)          | 68.96 (58.69-79.24)   | 136.76 (57.06-322.81)    | 270.81 (111.54-636.11)  |
| <b>Pakistan</b>    | 4.89 (1.18-14.23)        | 20.98 (5.01-58.43) | 21.75 (18.70-24.90)          | 67.22 (57.19-77.28)   | 82.02 (32.81-200.65)     | 280.19 (110.44-683.03)  |
| <b>Sri Lanka</b>   | 18.95 (4.47-49.76)       | 23.53 (5.52-60.92) | 84.32 (72.77-96.48)          | 86.29 (73.91-98.61)   | 321.52 (132.12-736.58)   | 342.98 (140.10-771.73)  |
| <b>South Asia</b>  | 9.48 (2.27-25.70)        | 22.07 (5.30-59.00) | 41.98 (36.00-48.30)          | 77.61 (66.20-89.00)   | 157.95 (65.56-367.14)    | 310.34 (128.03-714.62)  |
| <b>Global</b>      | 20.98 (5.27-54.36)       | 22.92 (5.83-59.20) | 93.52 (80.35-106.40)         | 94.99 (81.59-107.86)  | 326.68 (144.81-705.12)   | 338.64 (151.02-731.27)  |

927  
928  
929  
930  
931  
932  
933  
934  
935  
936  
937  
938  
939  
940  
941  
942  
943  
944  
945  
946  
947  
948  
949  
950  
951  
952  
953  
954  
955

**Table 3.** All ages (crude) and age-standardized death, incidence and DALY rates for all-cause dementia in South Asian countries with uncertainty intervals (UI). Global averages are also shown for comparison. Data source: Global Burden of Disease Study (2019).

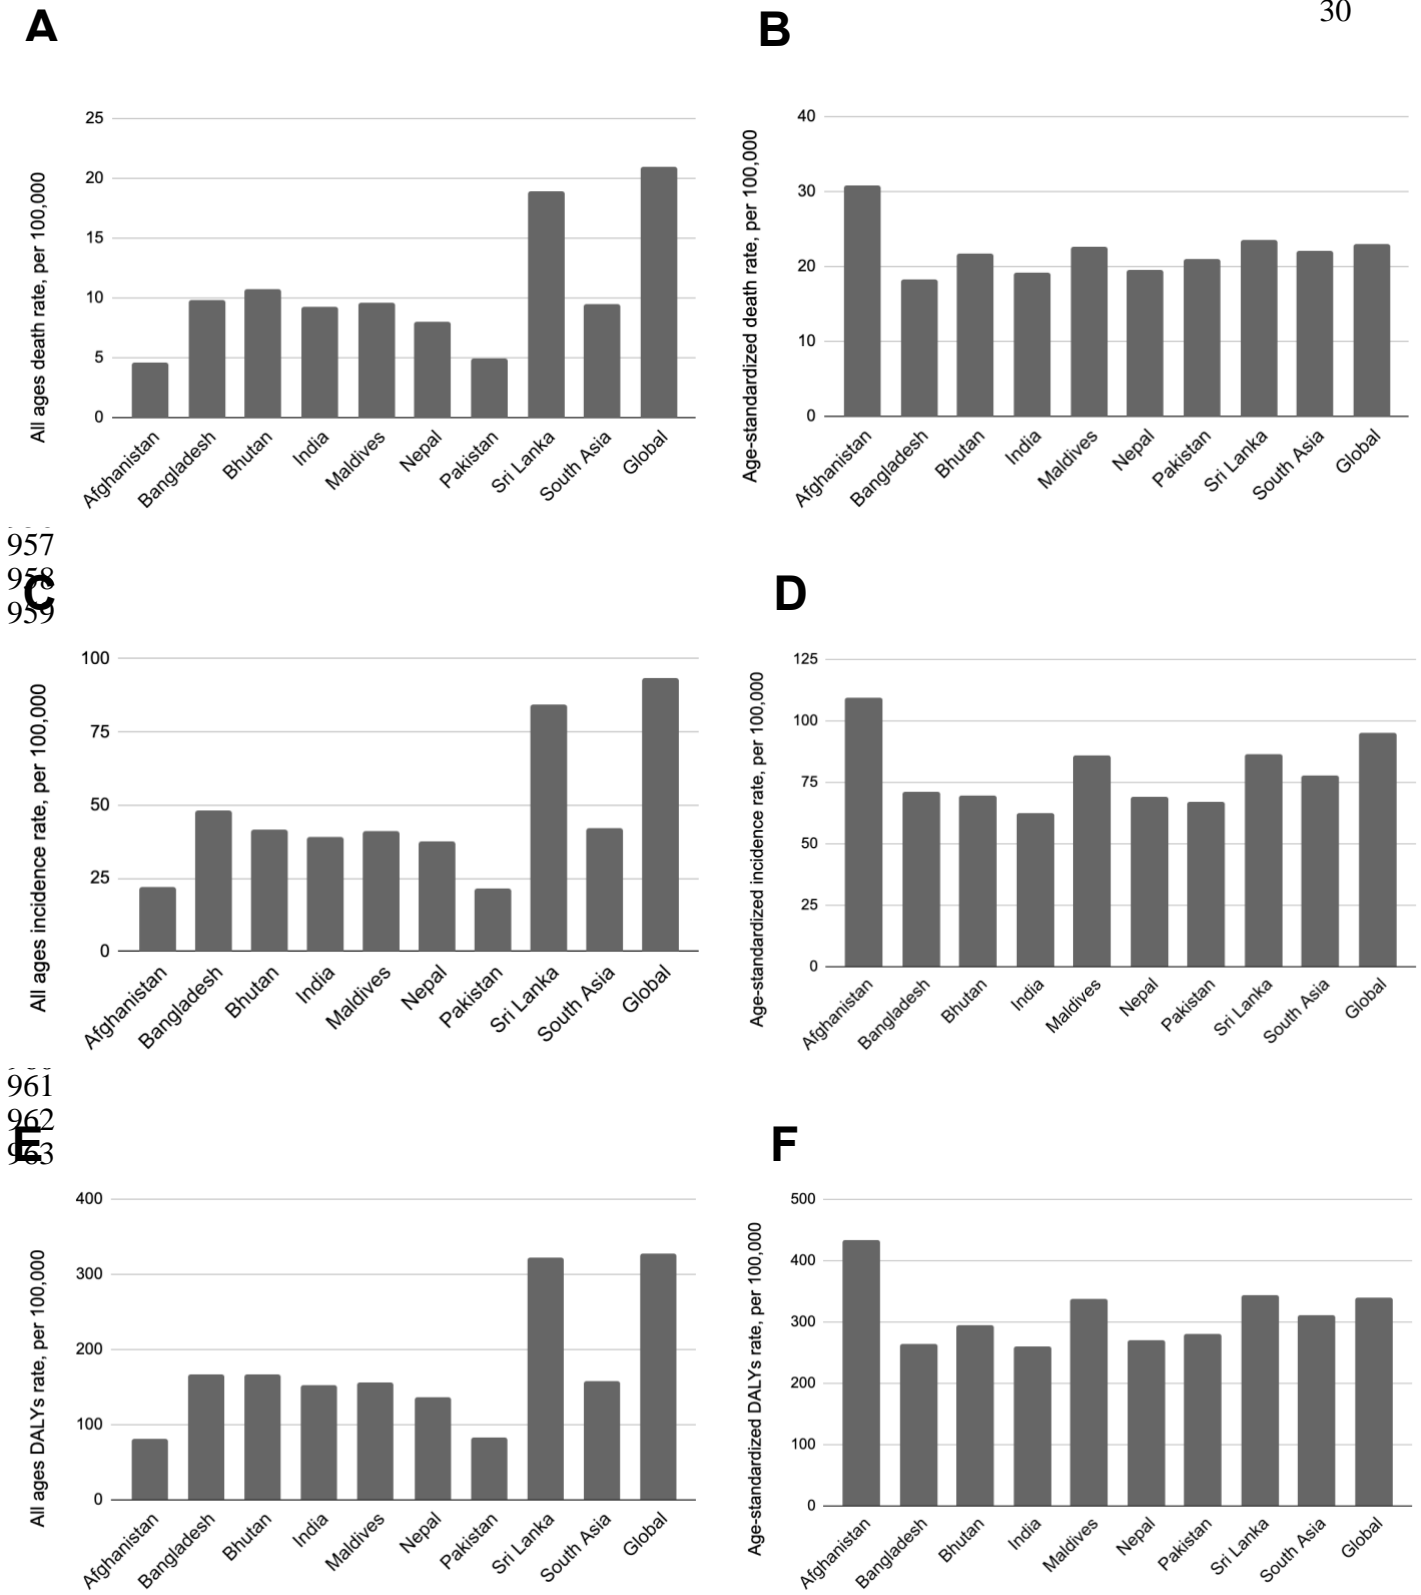

965  
 966 **Figure 1.** All ages (crude **A**) death rates, **C**) incidence rates, **E**) DALY rates and age-  
 967 standardized **B**) death rates, **D**) incidence rates, **F**) DALY rates of dementia in South Asian  
 968 nations. South Asia and global averages are also shown for comparison. All rates are per  
 969 100,000. Disability-adjusted life years, DALYs. Data source: Global Burden of Disease Study  
 970 (2019).

971

972

**A**

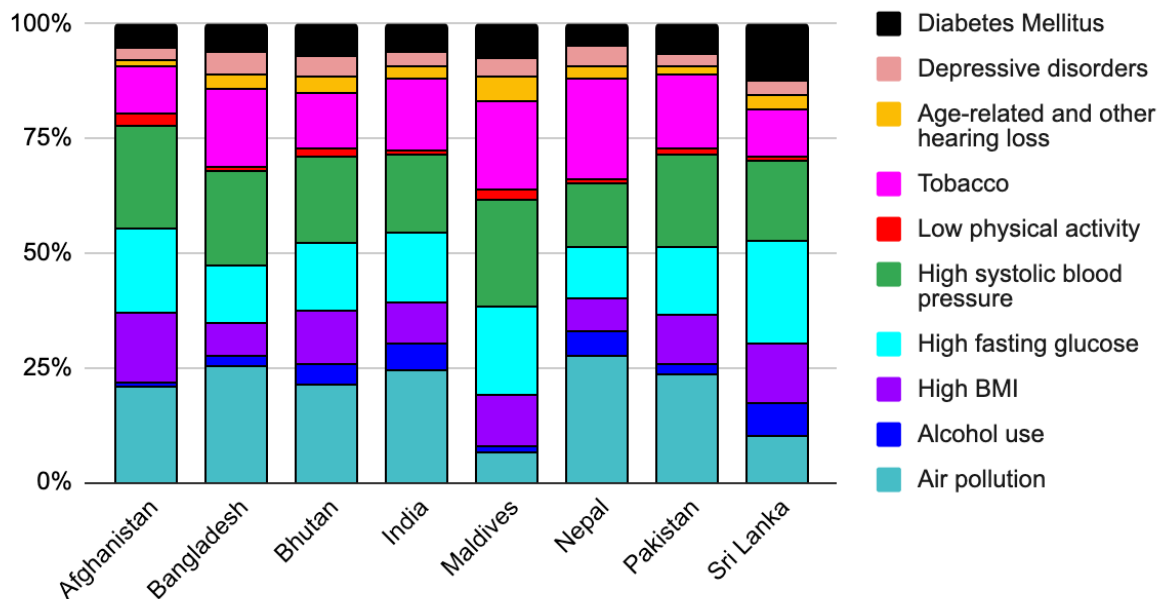

973

974

**B**

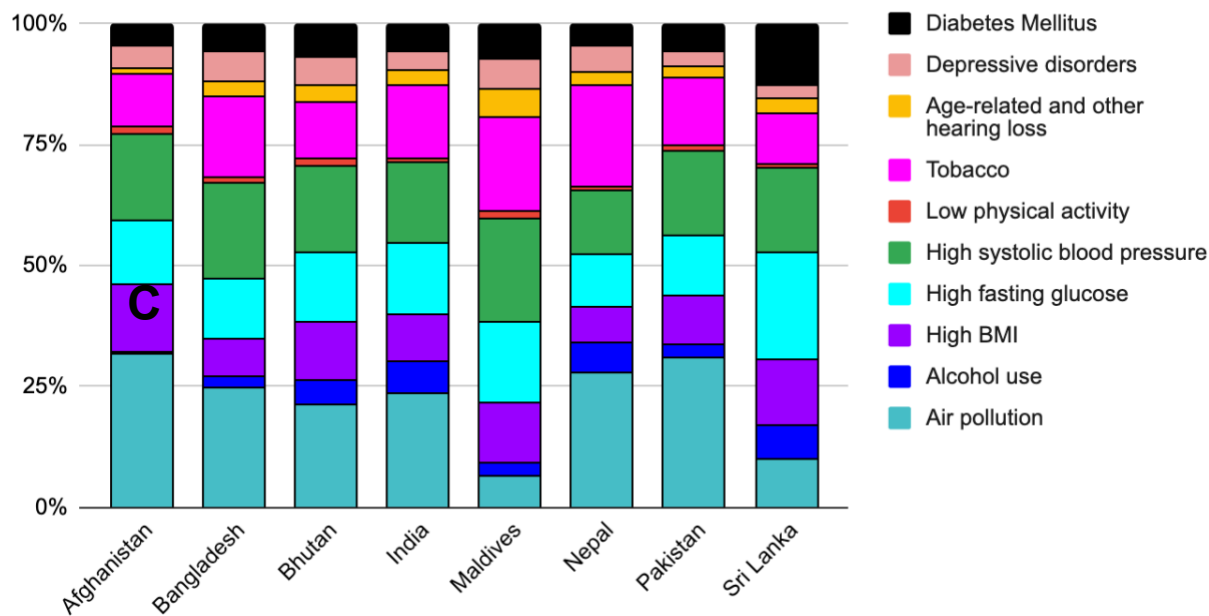

975

976

977

978

979

980

981

982

983

**Figure 2. A)** All ages (crude) and **B)** age-standardized DALY rates of known disease risk factors that have implications for dementia, compared between the 8 South Asian nations. Data source: BMI, body mass index. Global Burden of Disease Study (2019).

984

| Risk factor                        | Correlation coefficient (Crude DALYs) | p-value (Crude DALYs) | Correlation coefficient (age-standardized DALYs) | p-value (age-standardized DALYs) |
|------------------------------------|---------------------------------------|-----------------------|--------------------------------------------------|----------------------------------|
| Air pollution                      | -0.63                                 | p=0.093               | 0.06                                             | p=0.885                          |
| Alcohol use                        | 0.67                                  | p=0.068               | -0.49                                            | p=0.222                          |
| High BMI                           | 0.39                                  | p=0.340               | 0.78*                                            | p=0.022                          |
| High fasting blood glucose         | 0.74*                                 | p=0.037               | 0.77*                                            | p=0.026                          |
| High systolic blood pressure       | 0.28                                  | p=0.498               | 0.64                                             | p=0.090                          |
| Low physical activity              | -0.28                                 | p=0.501               | 0.78*                                            | p=0.021                          |
| Tobacco                            | -0.15                                 | p=0.719               | -0.18                                            | p=0.664                          |
| Age-related and other hearing loss | 0.87*                                 | p=0.005               | -0.50                                            | p=0.205                          |
| Depressive disorders               | -0.35                                 | p=0.398               | 0.01                                             | p=0.989                          |
| Diabetes Mellitus                  | 0.85*                                 | p=0.007               | 0.52                                             | p=0.187                          |

985

986

**Table 4.** Correlation between biological, behavioral and environmental risk factors and dementia in South Asia. Pearson correlation coefficients (R-values) and statistical significance (p-values) are shown for crude and age-standardized DALYs. \*Statistically significant (p<0.05). Data source: Global Burden of Disease Study (2019).

987

988

989

990

991

992

993

994

995

996

997

998

999

1000

1001

1002

1003

1004

1005

1006

1007

1008

1009

1010

1011

1012

1013

1014

1015

1016

1017

1018

1019

1020

1021

1022



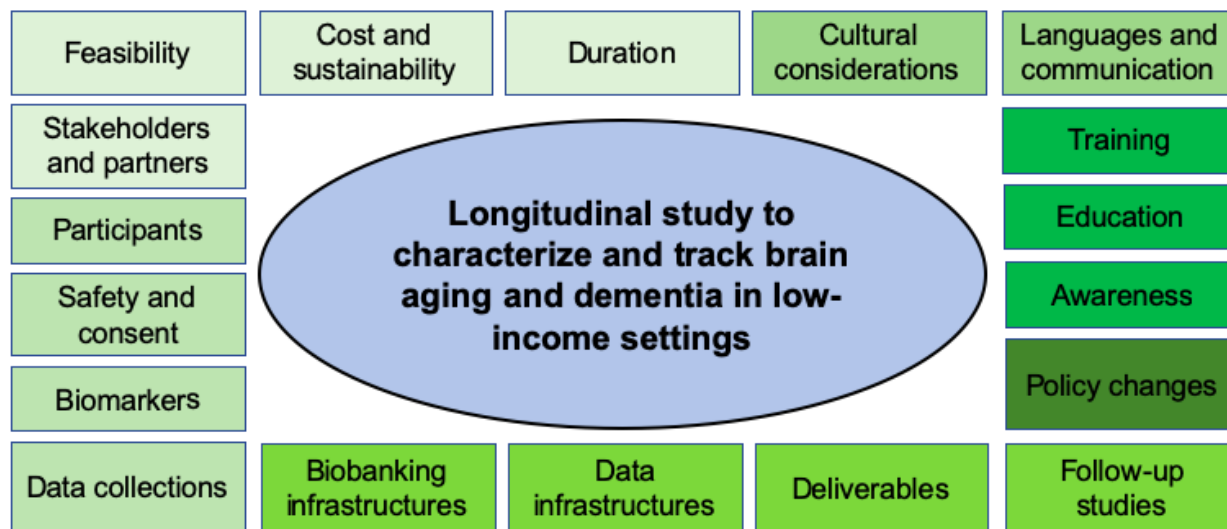

1023

1024 **Figure 3.** Considerations for setting up future longitudinal studies examining brain aging and  
1025 dementia in low-income settings such as countries in South Asia.  
1026

1027

1028

1029

1030
